# Supplementary figures and images for: Revealing the relationship between the Au decoration method and the enhanced acetone sensing performance of a mesoporous In2O3-based gas sensor
Source: Royal Society of Chemistry journal article supplement (doi:10.1039/c9tc05082e), 2019-10-31

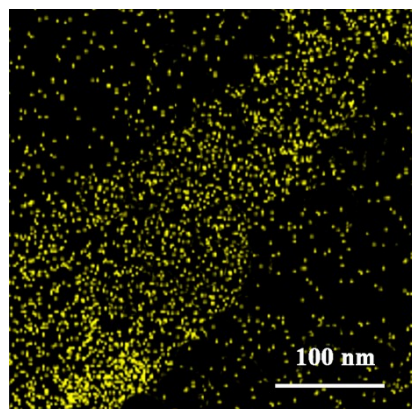

Fig. S1. Distribution of Au element in IO-Au-D sample detected by EDS.

Supplement: c9tc05082e1.pdf [file c9tc05082e1.pdf]
